# Supplementary material for: ITGB5 is highly expressed in ischemic stroke and cerebrovascular dementia to induce disease progression
Source: Research Square preprint supplement (doi:10.21203/rs.3.rs-8737994/v1), 2026-02-19
Supplement: Supplementary file 1 [file f12c5c0b83387b89ab66a0d1.docx]

**Table.1 A summary of miRNAs that regulate hub genes.**

| Databases | Gene | miRNA | | |
| --- | --- | --- | --- | --- |
| TargetScan |  |  |  |  |
|  | ITGB5 | hsa-miR-421 | hsa-miR-495-3p | hsa-miR-5688 |
| DIANA-TarBase |  |  |  |  |
|  | ITGB5 | hsa-miR-34a-5p | hsa-let-7a-5p | hsa-let-7f-5p |
| miRTarBase |  |  |  |  |
|  | ITGB5 | hsa-miR-335-5p | hsa-miR-155-5p | hsa-let-7b-5p |
